# Supplementary material for: Groundwater dynamics beneath a marine ice sheet
Source: Copernicus journal article supplement (doi:10.5194/tc-19-3725-2025), 2025-09-12
Supplement: Supplementary file 1 [file tc-19-3725-2025-supplement.pdf]

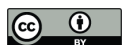

*Supplement of*

## **Groundwater dynamics beneath a marine ice sheet**

**Gabriel J. Cairns et al.**

*Correspondence to:* Gabriel J. Cairns (cairns@maths.ox.ac.uk)

The copyright of individual parts of the supplement might differ from the article licence.

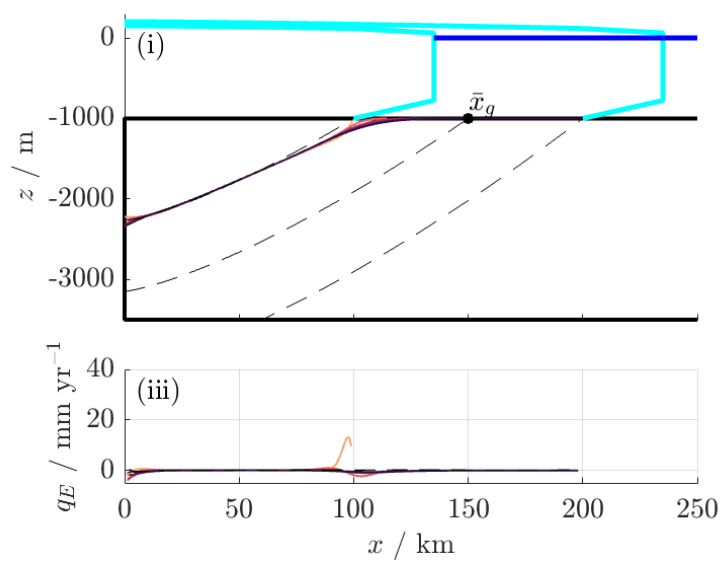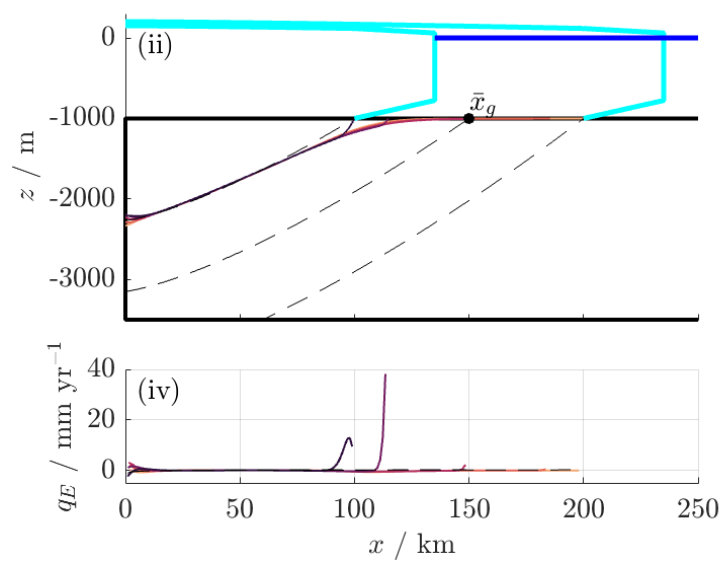

Figure S1: As in Figure 3, but with  $K=0.01$ .
